# Supplementary material
Source: publisher figshare collection journal article supplement (https://acs.figshare.com/ndownloader/files/4062763)
Supplement: Supplementary file 1 [file 4062763]

**Supporting information**

**Nitrogen doping effects on the physical and chemical properties of mesoporous carbons**

*Huichao Chen, Fugen Sun, Jitong Wang, Wencheng Li, Wenming Qiao, Licheng Ling and Donghui Long\**

*State Key Laboratory of Chemical Engineering, East China University of Science and Technology,  
Shanghai 200237*

\*To whom correspondence should be addressed. E-mail: [longdh@mail.ecust.edu.cn](mailto:longdh@mail.ecust.edu.cn).

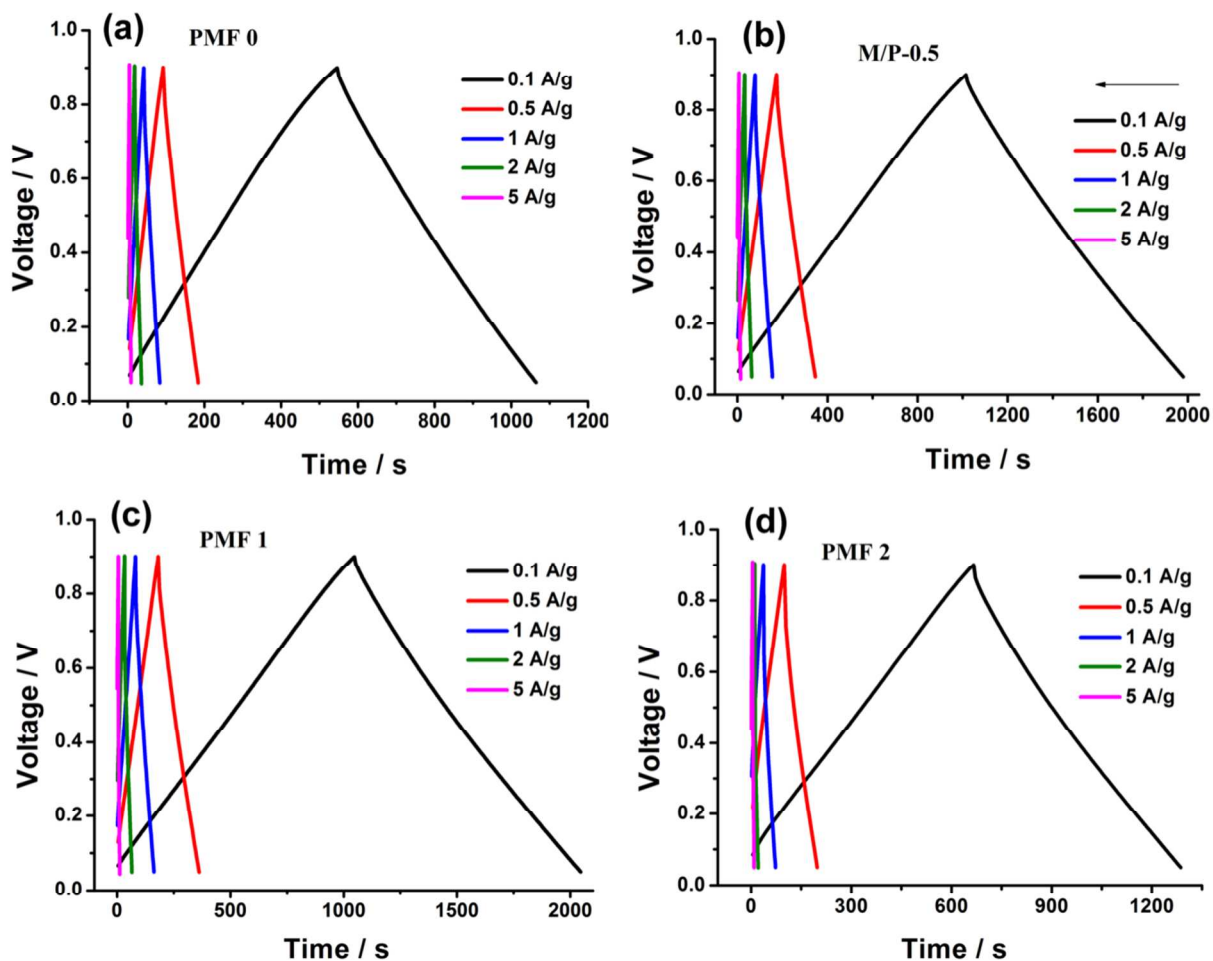

**Figure S1.** Charge–discharge behaviors of the NMCs with different current densities (0.1–5 A/g) in 3 M H<sub>2</sub>SO<sub>4</sub> solution.

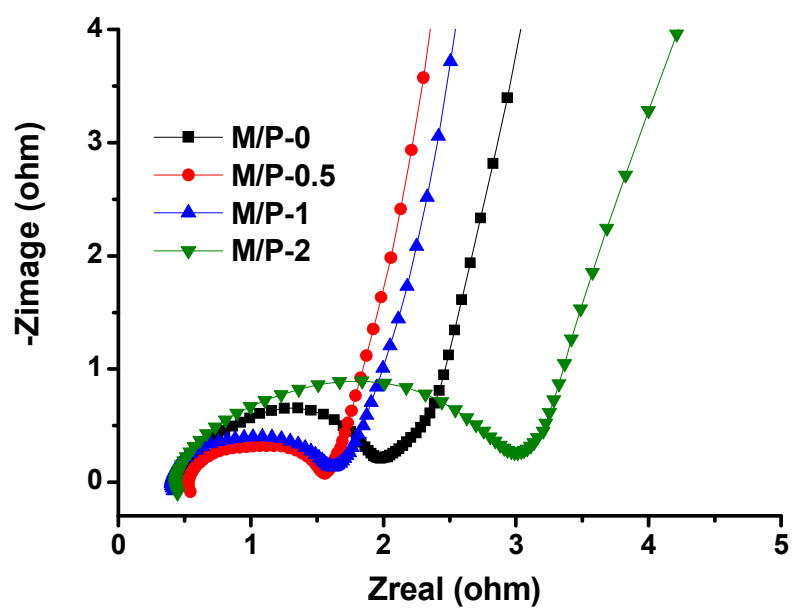

**Figure S2.**EIS profiles of the NMCs in 3 M H<sub>2</sub>SO<sub>4</sub> solution.
